# Supplementary material
Source: Springer Nature journal article supplement (https://www.springermedizin.de/resource/supplementary/12874_2012_914_MOESM4_ESM.pdf/9433050)

Agnes 60-69

Agnes 80+

Probability of death

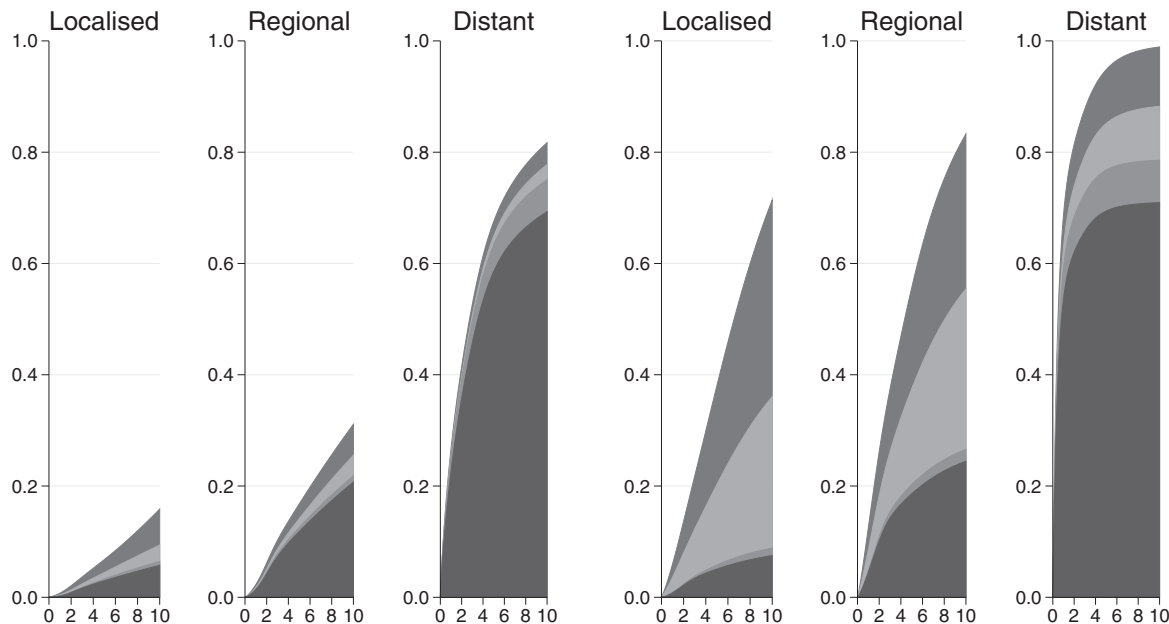

Time since diagnosis (years)

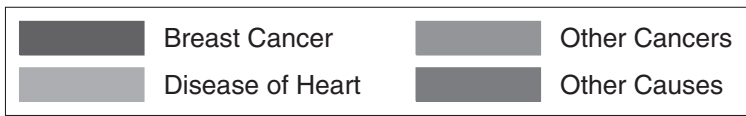

Supplement: MOESM4 [file 9433050]
